# Supplementary material
Source: ML conference proceedings conference paper supplement (https://openreview.net/forum?id=sv2wC7Amb0s)
Supplement: supplementary_material [file attachment]

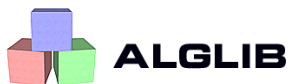

---

## ALGLIB PERSONAL AND ACADEMIC USE LICENSE AGREEMENT V1.0

### License Agreement

Sole Proprietor **Bochkanov Sergey Anatolyevich** hereinafter referred to as the “Licensor” on the one hand and Licensee on the other hand have concluded the present Agreement to the following effect:

### 1. Subject-Matter of the Agreement

This ALGLIB Personal and Academic Use License Agreement governs your access to and use of the Program(s) – Free Editions of **ALGLIB for CPython** and **ALGLIB for Delphi**. These products are delivered to you for free, but with certain restrictions outlined below.

It does **not** apply to Free Editions of *ALGLIB for C++* and *ALGLIB for C#*, which are licensed under version 2 of the GNU General Public License (“GPL”) or higher.

It does **not** apply to Commercial Editions of products above, which are licensed under different license terms and are non-free.

### 2. Accepting the Agreement

Licensor accepts present Agreement by making its text and Program(s) available for download at ALGLIB website. Licensee accepts Agreement by downloading Program.

### 3. License grant

Licensor grants you a personal, non-exclusive, non-transferable, limited license without fees to use the Program for the following purposes:

- (a) Internal Personal Use,
- (b) Internal Academic Use,
- (c) Internal Non-Profit Research Use.

Here:

1. **'Internal Use'** is use solely on computers owned/controlled by Licensee, without any kind of Program redistribution and/or remote access by third parties
2. **'Internal Personal Use'** is Internal Use solely by Licensee for its own purposes, assuming that Licensee is not compensated in any way for the job done with Program
3. **'Internal Academic Use'** is Internal Use by school, college or university (or some other degree granting organization) for educational and/or research purposes
4. **'Internal Non-Profit Research Use'** is Internal Use by non-profit research organization for non-profit research purposes

If your usage fails to comply with conditions above (for example: commercial usage by individual person; for-profit research performed by non-profit organization, and so on), then you can not use Program under terms of present Agreement.

### 4. Restrictions:

- Licensee may NOT use ALGLIB except as provided in this Agreement.
- Licensee may NOT distribute, rent or lease ALGLIB to any third party.
- Licensee may NOT provide remote access to ALGLIB
- Licensee may NOT disassemble, reverse engineer, decompile, modify binary components of ALGLIB.
- Licensee may NOT remove any copyright notice from the source code / binary components.
- Licensee may NOT disable/remove code which checks for presence of license keys (if such code is included in ALGLIB) from the source code / binary components.

## **5. Copyright**

Title to the ALGLIB and all copies thereof remain with Licensor. The ALGLIB is copyrighted and is protected by Russian copyright laws and international treaty provisions. You will not remove any copyright notice from the ALGLIB files. You agree to prevent any unauthorized copying of the ALGLIB. Except as expressly provided herein, Licensor does not grant any express or implied right to you under Licensor patents, copyrights, trademarks, or trade secret information.

## **6. Jurisdiction**

This Agreement is governed by the legislation of the Russian Federation.

## **7. Warranties**

THE PROGRAM IS PROVIDED 'AS IS', WITHOUT WARRANTY OF ANY KIND, EITHER EXPRESSED OR IMPLIED, INCLUDING, BUT NOT LIMITED TO, THE IMPLIED WARRANTIES OF MERCHANTABILITY, FITNESS FOR A PARTICULAR PURPOSE OR NON-INFRINGEMENT, EXCEPT TO THE EXTENT THAT THESE DISCLAIMERS ARE HELD TO BE LEGALLY INVALID.

The Licensor shall not be liable for any direct or indirect consequences of any use or improper use of the Program and/or damage caused to the Licensee (including, but not limited to, planet destruction) and/or third parties as a result of any use or disuse of the Program including the possible faults or failures of the Program functioning to the maximum extent allowed by the applicable legislation.

## **8. Thanks**

Thank you for choosing ALGLIB!
